# Supplementary material for: Comprehensive study on cellular morphologies, proliferation, motility, and epithelial–mesenchymal transition of breast cancer cells incubated on electrospun polymeric fiber substrates
Source: Royal Society of Chemistry journal article supplement (doi:10.1039/c7tb00207f), 2017-01-01
Supplement: c7tb00207f1.pdf [file c7tb00207f1.pdf]

**Comprehensive study on cellular morphologies, proliferation, motility, and epithelial–mesenchymal transition of breast cancer cells incubated on electrospun polymeric fiber substrates**

Ryota Domura,<sup>†</sup> Rie Sasaki,<sup>†</sup> Masami Okamoto,<sup>†</sup> \* Minoru Hirano,<sup>§</sup> Katsunori Kohda,<sup>§</sup> Brett Napiwocki,<sup>¶</sup> and Lih-Sheng Turng,<sup>‡</sup>

<sup>†</sup>Advanced Polymeric Nanostructured Materials Engineering, Graduate School of Engineering, Toyota Technological Institute, 2-12-1 Hisakata, Tempaku, Nagoya 468 8511, Japan

<sup>§</sup>Toyota Central R&D Labs., Inc. 41-1 Yokomichi, Nagakute, 480 1192, Japan

<sup>¶</sup>Department of Engineering Physics, University of Wisconsin–Madison, WI, USA

<sup>‡</sup>Wisconsin Institute for Discovery and Polymer Engineering Center, Department of Mechanical Engineering, University of Wisconsin–Madison, WI, USA

**Supplementary data: Figures S1, S2, S3, and Tables S1, and S2**

(a) MDA-MB-231

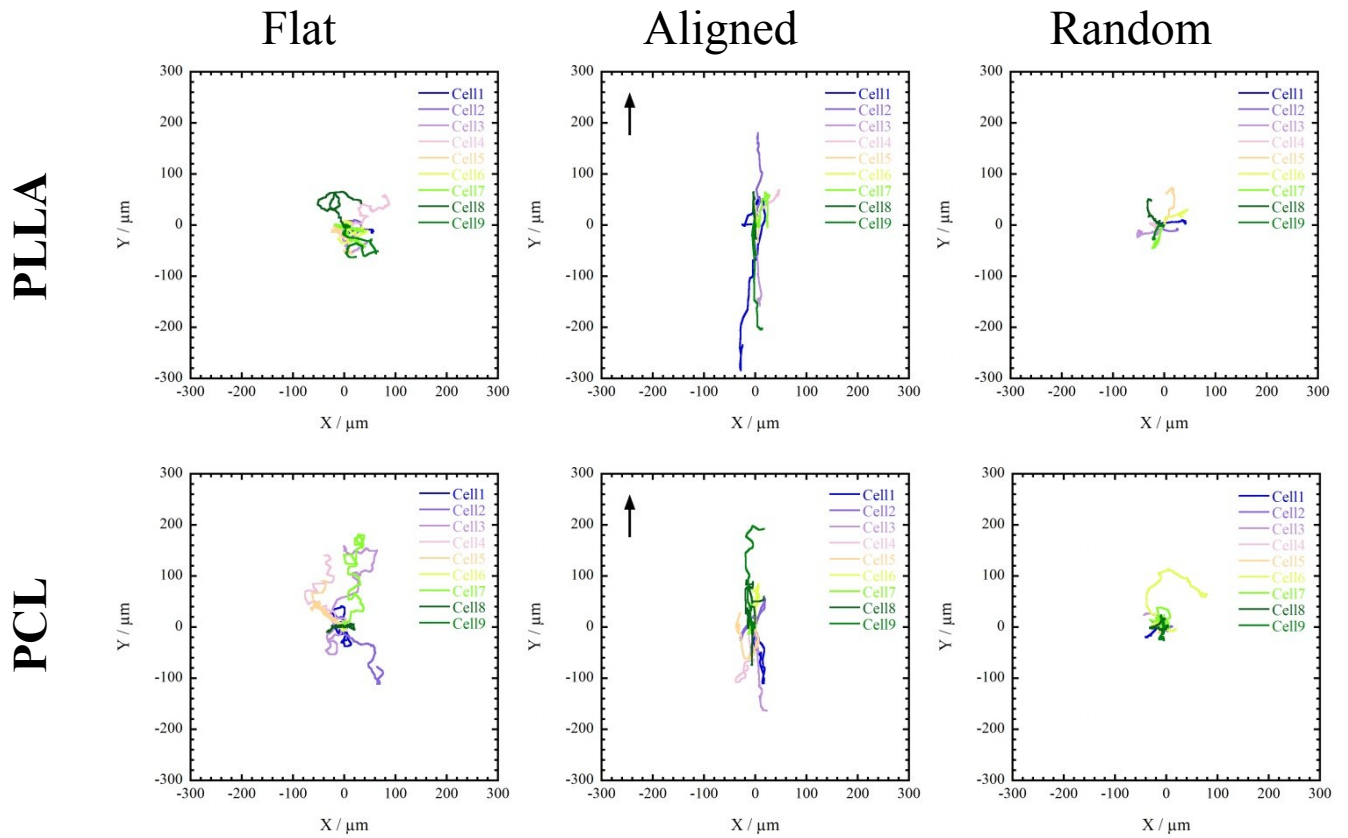

(b) MCF-7

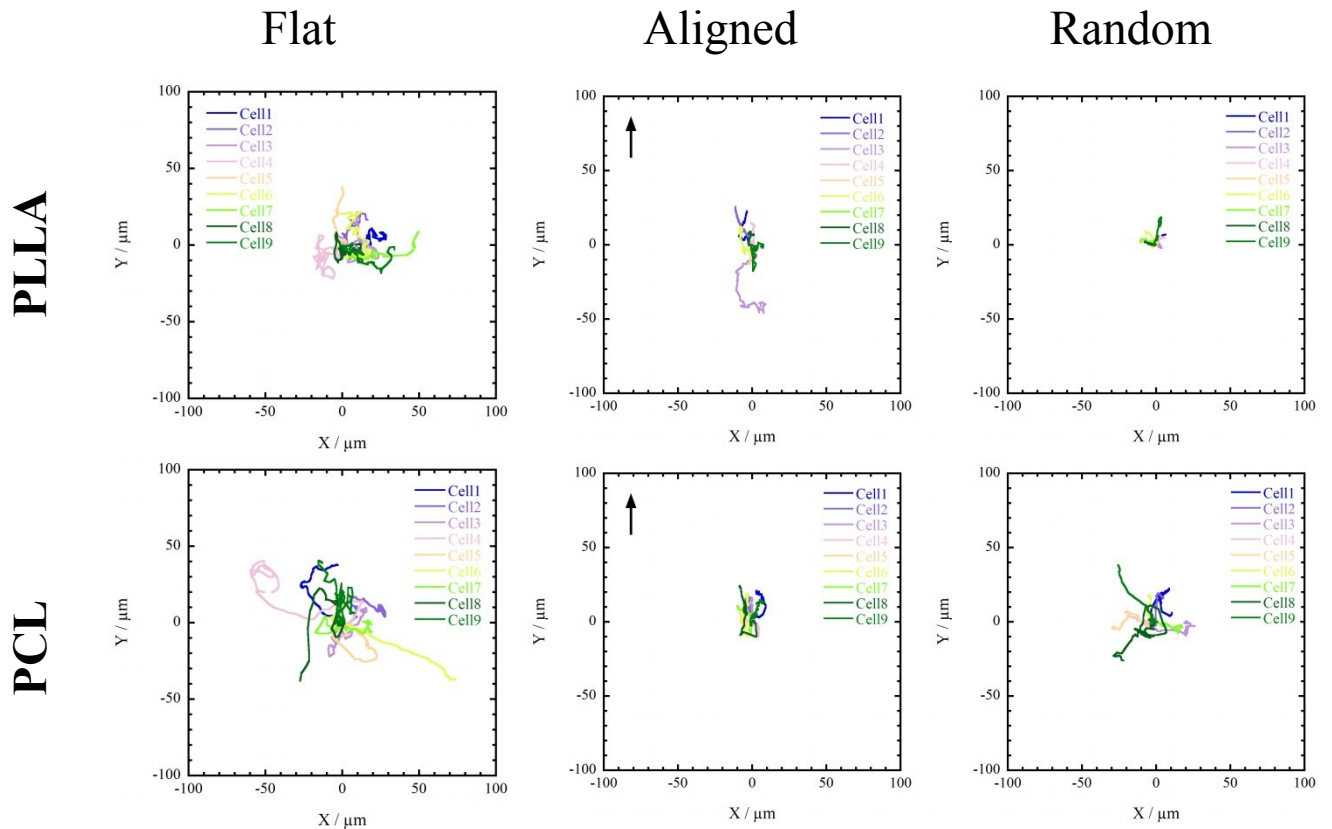

**Fig. S1.** Representative trajectory of cells cultured on six different substrates for 3 day: (a) MDA-MB-231 and (b) MCF-7. Arrows indicate the aligned fiber direction of the substrate.

(a) PLLA

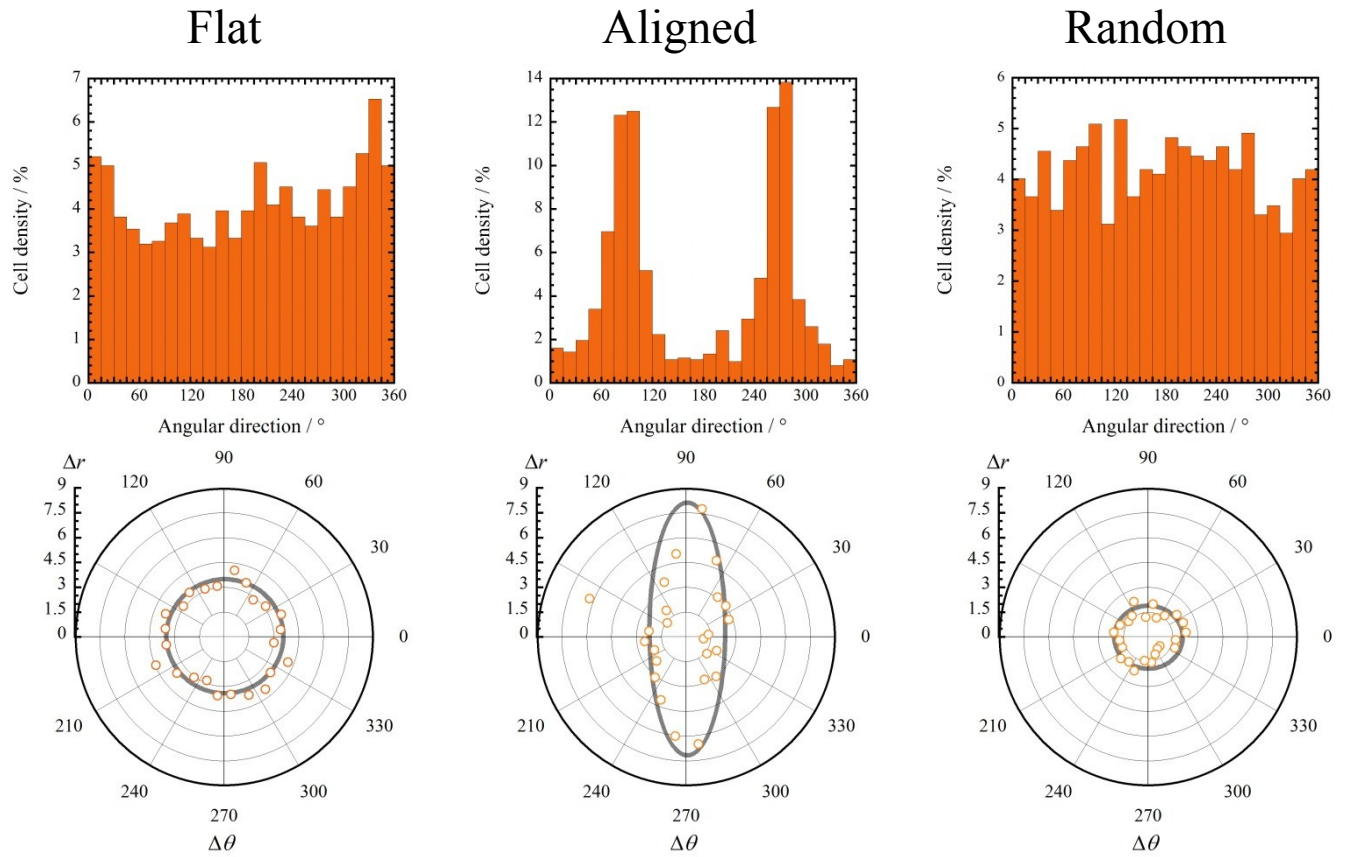

(b) PCL

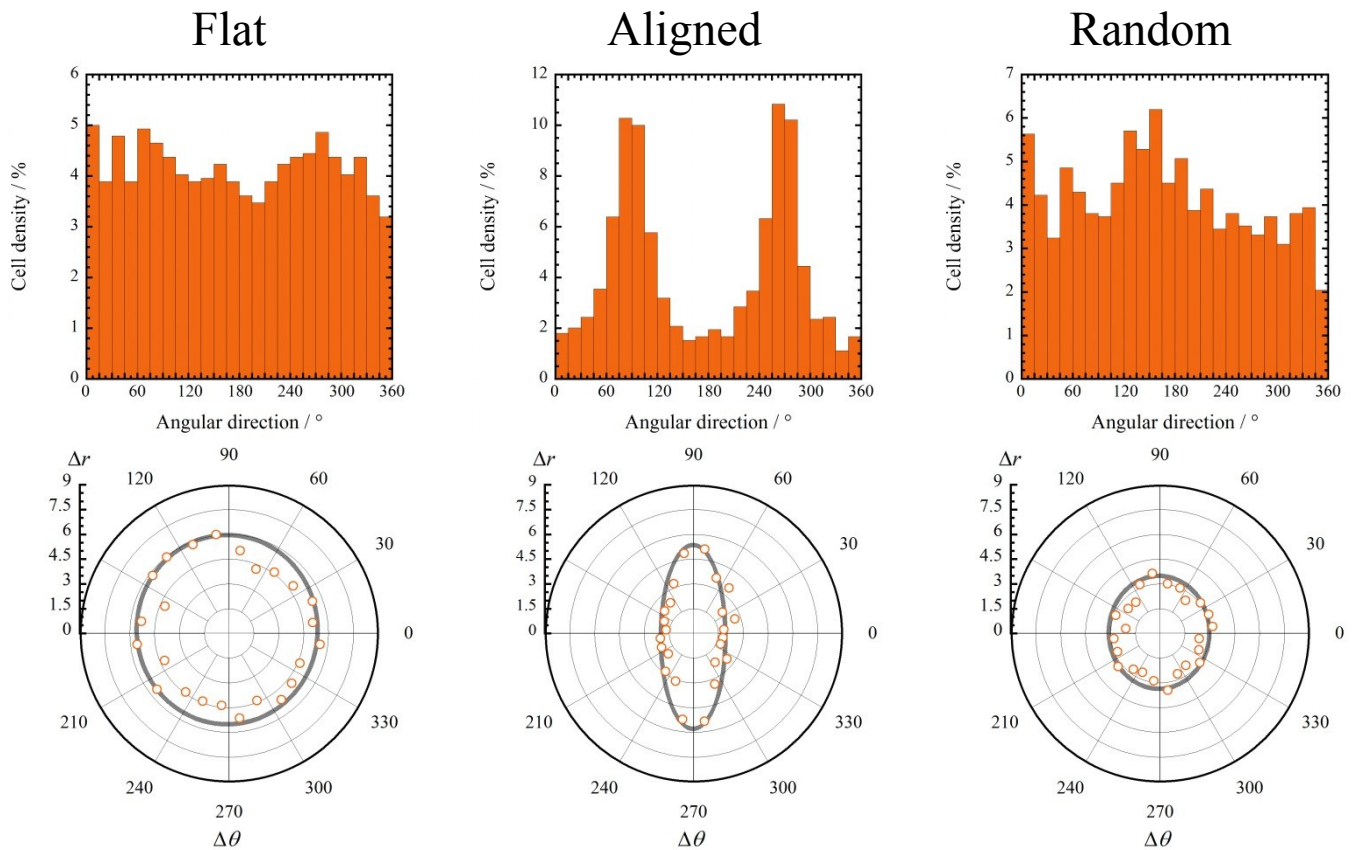

**Fig. S2.** Polar coordinate plots of the calculated  $\Delta r(x, y)$  and  $\Delta \theta(x, y)$  (Lower panels) and percentage cell density vs. azimuthal angular distribution of the polar coordinate (Top panels) for MDA-MB-231 cells cultured on (a) PLLA and (b) PCL substrates for 3 day.

(a) PLLA

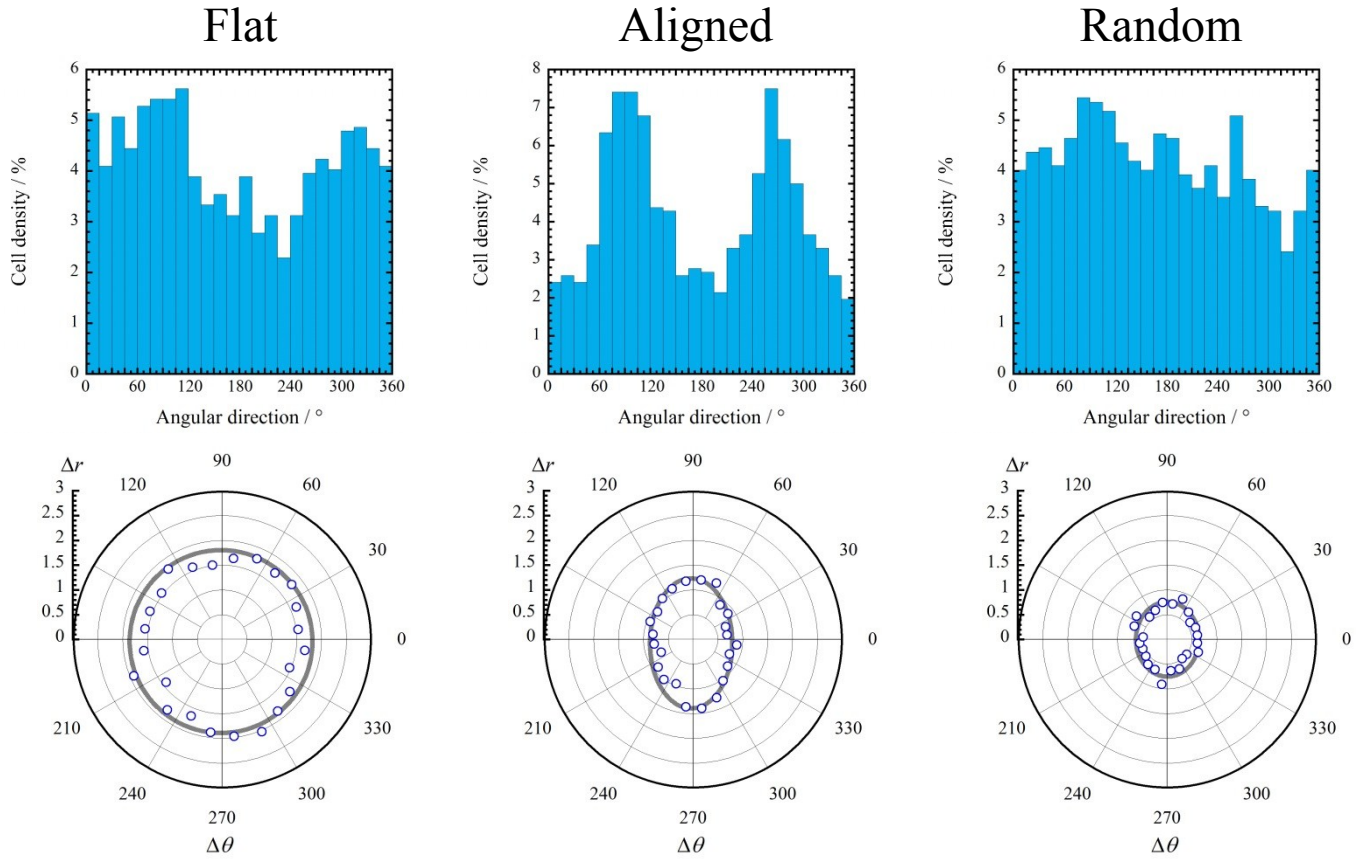

(b) PCL

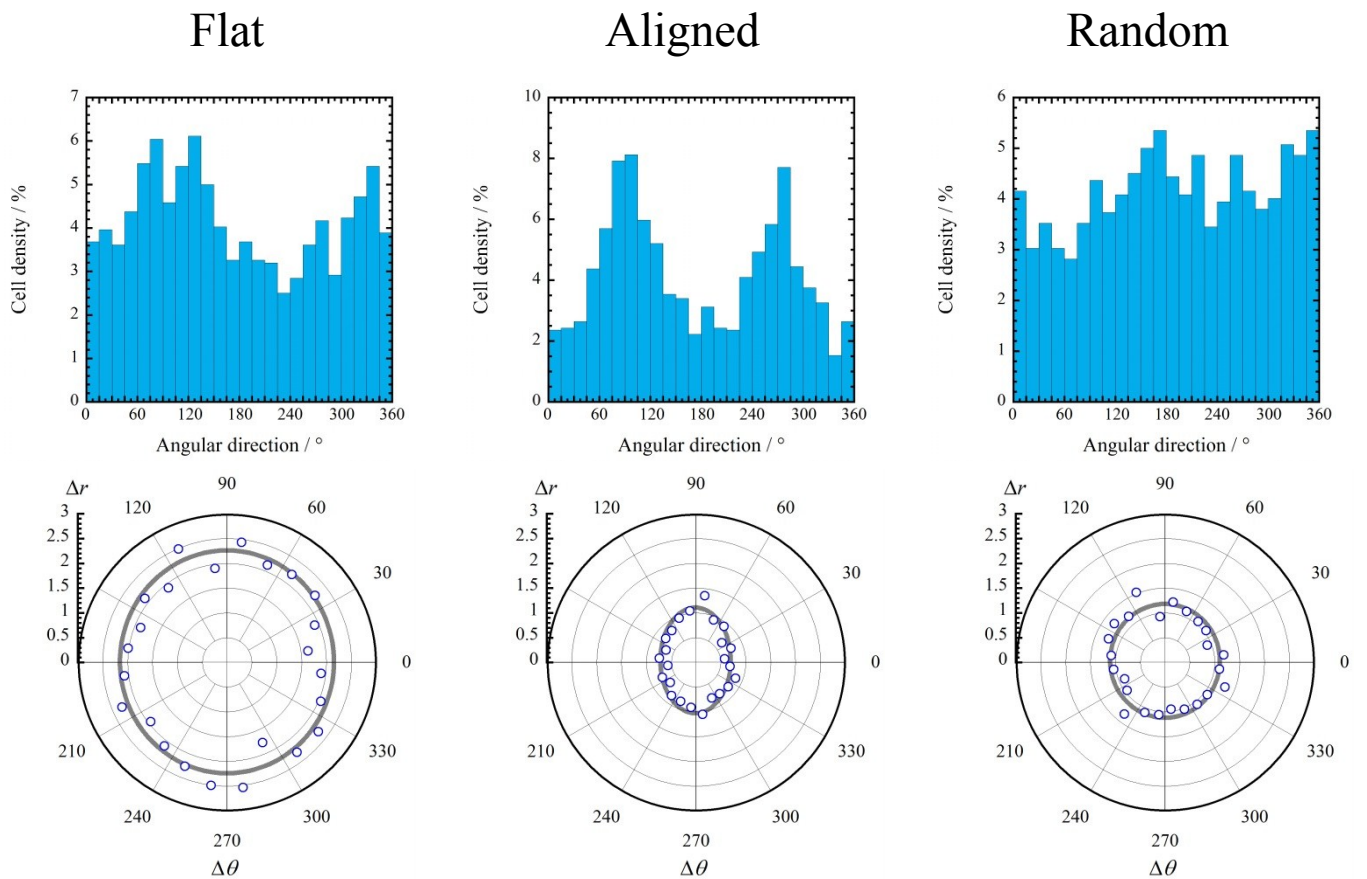

**Fig. S3.** Polar coordinate plots of the calculated  $\Delta r$  ( $x, y$ ) and  $\Delta \theta$  ( $x, y$ ) (Lower panels) and percentage cell density vs. azimuthal angular distribution of the polar coordinate (Top panels) for MCF-7 cells cultured on (a) PLLA and (b) PCL substrates for 3 day.

**Table S1.** Summary of cellular migration speed ( $S$ ) persistent time ( $P$ ), and cellular diffusivity ( $D$ ) of MDA-MB-231 cells at day 1 and day 3 cultured on six different substrates.

| Material |       | substrate | $S$ ( $\mu\text{m}/\text{min}$ ) | $P$ (min) | $R^2$ | $D$ ( $\mu\text{m}^2/\text{min}$ ) |
|----------|-------|-----------|----------------------------------|-----------|-------|------------------------------------|
| PLLA     | Day 1 | Flat      | 0.531                            | 15.08     | 0.996 | 2.12                               |
|          |       | Aligned   | 0.343                            | 36.13     | 0.997 | 2.13                               |
|          |       | Random    | 0.217                            | 28.48     | 0.997 | 0.67                               |
|          | Day 3 | Flat      | 0.254                            | 43.37     | 0.997 | 1.40                               |
|          |       | Aligned   | 0.418                            | 66.47     | 0.999 | 5.82                               |
|          |       | Random    | 0.155                            | 48.99     | 0.997 | 0.58                               |
| PCL      | Day 1 | Flat      | 0.661                            | 13.55     | 0.997 | 2.96                               |
|          |       | Aligned   | 0.328                            | 63.96     | 0.998 | 3.45                               |
|          |       | Random    | 0.195                            | 78.91     | 0.998 | 1.50                               |
|          | Day 3 | Flat      | 0.337                            | 62.92     | 0.998 | 3.58                               |
|          |       | Aligned   | 0.459                            | 12.38     | 0.997 | 1.30                               |
|          |       | Random    | 0.290                            | 15.42     | 0.997 | 0.65                               |

**Table S2.** Summary of cellular migration speed ( $S$ ) persistent time ( $P$ ), and cellular diffusivity ( $D$ ) of MCF-7 cells at day 1 and day 3 cultured on six different substrates.

| Material |       | substrate | $S$ ( $\mu\text{m}/\text{min}$ ) | $P$ (min) | $R^2$ | $D$ ( $\mu\text{m}^2/\text{min}$ ) |
|----------|-------|-----------|----------------------------------|-----------|-------|------------------------------------|
| PLLA     | Day 1 | Flat      | 0.514                            | 1.41      | 0.997 | 0.19                               |
|          |       | Aligned   | 0.290                            | 2.65      | 0.996 | 0.11                               |
|          |       | Random    | 0.373                            | 0.58      | 0.999 | 0.04                               |
|          | Day 3 | Flat      | 0.181                            | 8.73      | 0.996 | 0.14                               |
|          |       | Aligned   | 0.054                            | 75.16     | 0.998 | 0.11                               |
|          |       | Random    | 0.060                            | 11.24     | 0.996 | 0.02                               |
| PCL      | Day 1 | Flat      | 0.306                            | 6.57      | 0.996 | 0.31                               |
|          |       | Aligned   | 0.080                            | 13.10     | 0.996 | 0.04                               |
|          |       | Random    | 0.077                            | 15.74     | 0.996 | 0.05                               |
|          | Day 3 | Flat      | 0.177                            | 21.68     | 0.997 | 0.34                               |
|          |       | Aligned   | 0.057                            | 34.47     | 0.997 | 0.06                               |
|          |       | Random    | 0.125                            | 12.84     | 0.997 | 0.10                               |
